# Supplementary material
Source: publisher figshare collection journal article supplement (https://diabetesjournals.figshare.com/articles/dataset/_/27283899)
Supplement: Supplementary file 4 [file 1]

## Supplementary Methods

### *Data sources*

NDR is a quality registry in Sweden founded in 1996, which was initiated as a tool for clinics to compare various medical results and nationwide goals set for DM. It is now an established generator for quality control and systemic works of improvement in the field of DM.(1) This registry prospectively assembles information regarding risk factors, complications of DM and medications. Data is entered manually by the clinics, in a web-based manner, each patient visit is encouraged to be reported by the clinics. Clinical information from all centers is anonymously extracted and centrally analyzed. The data reported in the NDR corresponds to a coverage of >90% of all T1DM patients in Sweden.(2)

Information regarding comorbidities and diagnoses during follow up were retrieved from the Swedish in-Patient Registry(3), while death and cause of death were provided through Cause of Death Registry(4) and all prescriptions including ATC codes filled at all pharmacies since 2005 from the Swedish Prescribed Drug Register (SPDR).(5) Diagnoses are classified according to the International Classification of Diseases (ICD-10). Data linkage between registries is nearly complete due to Sweden's unique personal identification number, received at birth or time of immigration.

### *Kidney function assessment*

The KDIGO categories are defined as follows: G1 - eGFR  $\geq 90$ , G2 - eGFR 60–89, G3 - eGFR 30–59, G4 - eGFR 15–29, and G5 - eGFR  $< 15$  ml/min/1.73m<sup>2</sup> (Table S1). The G1 category is further divided into G1a (eGFR 90–104 ml/min/1.73m<sup>2</sup>) and G1b (eGFR  $\geq 105$  ml/min/1.73m<sup>2</sup>). Similarly, the G3 category is subdivided into G3a (eGFR 45–59 ml/min/1.73m<sup>2</sup>) and G3b (eGFR 30–44 ml/min/1.73m<sup>2</sup>). Albuminuria is categorized as A1 for normoalbuminuria (urine albumin/creatinine ratio, UACR  $< 30$  mg/g), A2 for microalbuminuria (UACR 30–300 mg/g), and A3 for macroalbuminuria (UACR  $> 300$  mg/g).

## Supplementary tables

Table S1 | KDIGO GFR and albuminuria categories

| Prognosis of CKD by GFR and albuminuria categories: KDIGO 2012      |     |                                  |       | Persistent albuminuria categories, description and range |                             |                          |
|---------------------------------------------------------------------|-----|----------------------------------|-------|----------------------------------------------------------|-----------------------------|--------------------------|
|                                                                     |     |                                  |       | A1                                                       | A2                          | A3                       |
|                                                                     |     |                                  |       | Normal to mildly increased                               | Moderately increased        | Severely increased       |
|                                                                     |     |                                  |       | <30 mg/g<br><3 mg/mmol                                   | 30–300 mg/g<br>3–30 mg/mmol | >300 mg/g<br>>30 mg/mmol |
| GFR categories (ml/min/1.73 m <sup>2</sup> ), description and range | G1  | Normal or high                   | ≥90   |                                                          |                             |                          |
|                                                                     | G2  | Mildly decreased                 | 60–89 |                                                          |                             |                          |
|                                                                     | G3a | Mildly to moderately decreased   | 45–59 |                                                          |                             |                          |
|                                                                     | G3b | Moderately to severely decreased | 30–44 |                                                          |                             |                          |
|                                                                     | G4  | Severely decreased               | 15–29 |                                                          |                             |                          |
|                                                                     | G5  | Kidney failure                   | <15   |                                                          |                             |                          |

green, low risk (if no other markers of kidney disease, no CKD); yellow, moderately increased risk; orange, high risk; red, very high risk.

Used with permission from *KDIGO 2012 Clinical Practice Guideline for the Evaluation and Management of Chronic Kidney Disease*.<sup>(6)</sup>

**Table S2 | ICD Codes reference**

| <b>Outcomes</b>        | <b>ICD codes</b>                                                                             |
|------------------------|----------------------------------------------------------------------------------------------|
| <b>Kidney</b>          |                                                                                              |
| Kidney Failure         | N185, Z490, Z491, Z492, Z99.2, DR012, DR013, DR014, DR015, DR016, DR023, DR024, DR055, DR056 |
| Acute Kidney Injury    | N17.0, N17.1, N17.2, N17.8, DR015 and DR023 (only if without N18 or N19.9)                   |
| <b>Cardiovascular</b>  |                                                                                              |
| Coronary heart disease | I20, I21, I22, I23, I24, I25                                                                 |
| Heart Failure          | I50                                                                                          |
| Stroke                 | I61, I62, I63, I64                                                                           |
| <b>Mortality</b>       |                                                                                              |
| All-cause              | All with a death date                                                                        |
| Renal death            | Any death occurring within four weeks after MAKE                                             |
| Cardiovascular         | Any death due to coronary heart disease or stroke                                            |
| <b>Cancer</b>          | C0, C1, C2, C3, C4, C5, C6, C7, C8, C9                                                       |

Table S3 | Baseline characteristics according to categorized variables

| <b>H</b>                                                 |                   |                 |                 |                |                |                |                 |
|----------------------------------------------------------|-------------------|-----------------|-----------------|----------------|----------------|----------------|-----------------|
|                                                          | <b>G1a</b>        | <b>G1b</b>      | <b>G2</b>       | <b>G3a</b>     | <b>G3b</b>     | <b>G4</b>      | <b>Total</b>    |
|                                                          | <b>N=22 850</b>   | <b>N=8169</b>   | <b>N=6051</b>   | <b>N=1043</b>  | <b>N=617</b>   | <b>N=337</b>   | <b>N=39 067</b> |
| <b>Female</b>                                            | 9554<br>(41.8%)   | 3596<br>(44.0%) | 3257<br>(53.8%) | 584<br>(56.0%) | 327<br>(53.0%) | 170<br>(50.4%) | 17 488(44.8%)   |
| <b>Age categories (years)</b>                            |                   |                 |                 |                |                |                |                 |
| <b>18–34</b>                                             | 17 853<br>(78.1%) | 2559<br>(31.3%) | 943<br>(15.6%)  | 70(6.7%)       | 24<br>(3.9%)   | 15<br>(4.5%)   | 21 464(54.9%)   |
| <b>35–49</b>                                             | 4485<br>(19.6%)   | 2692<br>(33.0%) | 2001<br>(33.1%) | 247<br>(23.7%) | 190<br>(30.8%) | 117<br>(34.7%) | 9732(24.9%)     |
| <b>50–59</b>                                             | 472(2.1%)         | 1928<br>(23.6%) | 1475<br>(24.4%) | 242<br>(23.2%) | 159<br>(25.8%) | 96<br>(28.5%)  | 4372(11.2%)     |
| <b>60–69</b>                                             | 38(0.2%)          | 906<br>(11.1%)  | 1159<br>(19.2%) | 309<br>(29.6%) | 148<br>(24.0%) | 79<br>(23.4%)  | 2639(6.8%)      |
| <b>70+</b>                                               | 2(0.0%)           | 84(1.0%)        | 473<br>(7.8%)   | 175<br>(16.8%) | 96<br>(15.6%)  | 30<br>(8.9%)   | 860(2.2%)       |
| <b>Duration of diabetes<br/>in categories (years)</b>    |                   |                 |                 |                |                |                |                 |
| <b>[0–5]</b>                                             | 5604<br>(24.5%)   | 642<br>(7.9%)   | 169<br>(2.8%)   | 8(0.8%)        | 3(0.5%)        | 2(0.6%)        | 6428(16.5%)     |
| <b>(5–10]</b>                                            | 4721<br>(20.7%)   | 618<br>(7.6%)   | 196<br>(3.2%)   | 11(1.1%)       | 6(1.0%)        | 2(0.6%)        | 5554(14.2%)     |
| <b>(10–15]</b>                                           | 4476<br>(19.6%)   | 757<br>(9.3%)   | 313<br>(5.2%)   | 16(1.5%)       | 5(0.8%)        | 3(0.9%)        | 5570(14.3%)     |
| <b>(15–20]</b>                                           | 3220<br>(14.1%)   | 842<br>(10.3%)  | 411<br>(6.8%)   | 38(3.6%)       | 26<br>(4.2%)   | 13<br>(3.9%)   | 4550(11.6%)     |
| <b>(20–25]</b>                                           | 1984<br>(8.7%)    | 893<br>(10.9%)  | 557<br>(9.2%)   | 61(5.8%)       | 34<br>(5.5%)   | 26<br>(7.7%)   | 3555(9.1%)      |
| <b>(25–30]</b>                                           | 1340<br>(5.9%)    | 1011<br>(12.4%) | 721<br>(11.9%)  | 84(8.1%)       | 68<br>(11.0%)  | 35<br>(10.4%)  | 3259(8.3%)      |
| <b>(30–35]</b>                                           | 822 (3.6%)        | 972<br>(11.9%)  | 797<br>(13.2%)  | 116<br>(11.1%) | 78<br>(12.6%)  | 47<br>(13.9%)  | 2832(7.2%)      |
| <b>35+</b>                                               | 683 (3.0%)        | 2434<br>(29.8%) | 2887<br>(47.7%) | 709<br>(68.0%) | 397<br>(64.3%) | 209<br>(62.0%) | 7319(18.7%)     |
| <b>HbA1c categories<br/>(mmol/mol)</b>                   |                   |                 |                 |                |                |                |                 |
| <b>&lt;48</b>                                            | 2700<br>(11.8%)   | 906<br>(11.1%)  | 611<br>(10.1%)  | 72<br>(6.9%)   | 49<br>(7.9%)   | 38<br>(11.3%)  | 4376<br>(11.2%) |
| <b>48–52</b>                                             | 1606<br>(7.0%)    | 664<br>(8.1%)   | 513<br>(8.5%)   | 72<br>(6.9%)   | 53<br>(8.6%)   | 25<br>(7.4%)   | 2933<br>(7.5%)  |
| <b>52–57</b>                                             | 2690<br>(11.8%)   | 1184<br>(14.5%) | 908<br>(15.0%)  | 129<br>(12.4%) | 73<br>(11.8%)  | 42<br>(12.5%)  | 5026(12.9%)     |
| <b>57–70</b>                                             | 7319<br>(32.0%)   | 3102<br>(38.0%) | 2235<br>(36.9%) | 385<br>(36.9%) | 198<br>(32.1%) | 116<br>(34.4%) | 13355(34.2%)    |
| <b>70+</b>                                               | 8109<br>(35.5%)   | 2181<br>(26.7%) | 1686<br>(27.9%) | 363<br>(34.8%) | 230<br>(37.3%) | 107<br>(31.8%) | 12676(32.4%)    |
| <b>Missing</b>                                           | 426(1.9%)         | 132<br>(1.6%)   | 98<br>(1.6%)    | 22(2.1%)       | 14<br>(2.3%)   | 9(2.7%)        | 701(1.8%)       |
| <b>Systolic blood<br/>pressure categories<br/>(mmHg)</b> |                   |                 |                 |                |                |                |                 |
| <b>&lt;110</b>                                           | 2641<br>(11.6%)   | 557<br>(6.8%)   | 309<br>(5.1%)   | 32(3.1%)       | 29<br>(4.7%)   | 8(2.4%)        | 3576(9.2%)      |
| <b>110–119</b>                                           | 5575<br>(24.4%)   | 1251<br>(15.3%) | 740<br>(12.2%)  | 75(7.2%)       | 30<br>(4.9%)   | 30<br>(8.9%)   | 7701(19.7%)     |
| <b>120–129</b>                                           | 7184<br>(31.4%)   | 2326<br>(28.5%) | 1476<br>(24.4%) | 212<br>(20.3%) | 107<br>(17.3%) | 59<br>(17.5%)  | 11 364(29.1%)   |

|                                                   |                  |                 |                 |                |                |                |                   |
|---------------------------------------------------|------------------|-----------------|-----------------|----------------|----------------|----------------|-------------------|
| <b>130–139</b>                                    | 3680<br>(16.1%)  | 1789<br>(21.9%) | 1391<br>(23.0%) | 234<br>(22.4%) | 133<br>(21.6%) | 60<br>(17.8%)  | 7287(18.7%)       |
| <b>140–149</b>                                    | 1363<br>(6.0%)   | 1044<br>(12.8%) | 957<br>(15.8%)  | 198<br>(19.0%) | 120<br>(19.4%) | 69<br>(20.5%)  | 3751(9.6%)        |
| <b>150–159</b>                                    | 405(1.8%)        | 455<br>(5.6%)   | 455<br>(7.5%)   | 114<br>(10.9%) | 71<br>(11.5%)  | 42<br>(12.5%)  | 1542(3.9%)        |
| <b>160+</b>                                       | 285(1.2%)        | 374<br>(4.6%)   | 462<br>(7.6%)   | 130<br>(12.5%) | 97<br>(15.7%)  | 55<br>(16.3%)  | 1403(3.6%)        |
| <b>Diastolic blood pressure categories (mmHg)</b> |                  |                 |                 |                |                |                |                   |
| <b>&lt;60</b>                                     | 585(2.6%)        | 183<br>(2.2%)   | 193<br>(3.2%)   | 50(4.8%)       | 31<br>(5.0%)   | 16<br>(4.7%)   | 1058(2.7%)        |
| <b>60–69</b>                                      | 4990<br>(21.8%)  | 1666<br>(20.4%) | 1304<br>(21.6%) | 260<br>(24.9%) | 135<br>(21.9%) | 67<br>(19.9%)  | 8422(21.6%)       |
| <b>70–79</b>                                      | 8822<br>(38.6%)  | 3250<br>(39.8%) | 2333<br>(38.6%) | 377<br>(36.1%) | 207<br>(33.5%) | 115<br>(34.1%) | 15 104<br>(38.7%) |
| <b>80–89</b>                                      | 5703<br>(25.0%)  | 2261<br>(27.7%) | 1662<br>(27.5%) | 233<br>(22.3%) | 167<br>(27.1%) | 93<br>(27.6%)  | 10119<br>(25.9%)  |
| <b>90–99</b>                                      | 838 (3.7%)       | 352<br>(4.3%)   | 238<br>(3.9%)   | 54<br>(5.2%)   | 30<br>(4.9%)   | 21<br>(6.2%)   | 1533<br>(3.9%)    |
| <b>100–109</b>                                    | 117<br>(0.5%)    | 52<br>(0.6%)    | 43<br>(0.7%)    | 16<br>(1.5%)   | 12<br>(1.9%)   | 5<br>(1.5%)    | 245<br>(0.6%)     |
| <b>110+</b>                                       | 9<br>(0.0%)      | 6<br>(0.1%)     | 3<br>(0.0%)     | 0<br>(0.0%)    | 2<br>(0.3%)    | 6<br>(1.8%)    | 26<br>(0.1%)      |
| <b>BMI categories</b>                             |                  |                 |                 |                |                |                |                   |
| <b>&lt; 18.5</b>                                  | 437<br>(1.9%)    | 60<br>(0.7%)    | 58<br>(1.0%)    | 10<br>(1.0%)   | 9<br>(1.5%)    | 7<br>(2.1%)    | 581<br>(1.5%)     |
| <b>19–25</b>                                      | 10187<br>(44.6%) | 3381<br>(41.4%) | 2342<br>(38.7%) | 378<br>(36.2%) | 221<br>(35.8%) | 140<br>(41.5%) | 16649<br>(42.6%)  |
| <b>25–30</b>                                      | 5742<br>(25.1%)  | 2702<br>(33.1%) | 2014<br>(33.3%) | 307<br>(29.4%) | 160<br>(25.9%) | 86<br>(25.5%)  | 11011<br>(28.2%)  |
| <b>30–35</b>                                      | 1650<br>(7.2%)   | 716<br>(8.8%)   | 600<br>(9.9%)   | 138<br>(13.2%) | 78<br>(12.6%)  | 33<br>(9.8%)   | 3215<br>(8.2%)    |
| <b>35–40</b>                                      | 453<br>(2.0%)    | 153<br>(1.9%)   | 154<br>(2.5%)   | 35<br>(3.4%)   | 34<br>(5.5%)   | 17<br>(5.0%)   | 846<br>(2.2%)     |
| <b>40+</b>                                        | 185<br>(0.8%)    | 47<br>(0.6%)    | 43<br>(0.7%)    | 10<br>(1.0%)   | 8<br>(1.3%)    | 4<br>(1.2%)    | 297<br>(0.8%)     |
| <b>Missing</b>                                    | 4196<br>(18.4%)  | 1110<br>(13.6%) | 840<br>(13.9%)  | 165<br>(15.8%) | 107<br>(17.3%) | 50<br>(14.8%)  | 6468<br>(16.6%)   |
|                                                   |                  |                 |                 |                |                |                |                   |

G1a: eGFR 105+, G1b: eGFR 90–104, G2: eGFR 60–89, G3a: eGFR 45–59, G3b: eGFR 30–44, G4: eGFR 15–29 ml/min/1.73m<sup>2</sup>, BMI: Body Mass Index

**Table S4a | Unadjusted hazard ratios for major outcomes with conventional G1A1+G2A1 categories as reference**

|     |              | A1                        | A2                        | A3                        |
|-----|--------------|---------------------------|---------------------------|---------------------------|
| G1  | 40 % decline | 1                         | 5.18<br>(4.00-6.72)       | 17.48<br>(13.08-23.35)    |
|     | KF           | 1                         | 3.72<br>(2.52-5.49)       | 17.39<br>(11.83-25.58)    |
|     | MAKE         | 1                         | 3.98<br>(3.11-5.09)       | 14.69<br>(11.22-19.24)    |
|     | MACE         | 1                         | 1.85<br>(1.65-2.07)       | 2.27<br>(1.85-2.78)       |
|     | Mortality    | 1                         | 1.9<br>(1.64-2.21)        | 2.56<br>(1.97-3.31)       |
| G2  | 40% decline  | 1                         | 12.24<br>(9.46-15.85)     | 28.37<br>(22.11-36.41)    |
|     | KF           | 1                         | 11.37<br>(8.01-16.13)     | 52.23<br>(39.23-69.55)    |
|     | MAKE         | 1                         | 9.87<br>(7.76-12.54)      | 28.78<br>(23.00-36.01)    |
|     | MACE         | 1                         | 4.80<br>(4.30-5.36)       | 7.00<br>(6.12-8.02)       |
|     | Mortality    | 1                         | 5.10<br>(4.44-5.86)       | 7.64<br>(6.47-9.03)       |
| G3a | 40% decline  | 10.39<br>(6.90-15.65)     | 14.41<br>(9.57-21.70)     | 51.62<br>(40.19-66.31)    |
|     | KF           | 25.14<br>(16.79-37.63)    | 33.56<br>(22.18-50.76)    | 146.04<br>(111.72-190.90) |
|     | MAKE         | 14.30<br>(10.30-19.85)    | 19.25<br>(13.74-27.00)    | 71.56<br>(57.82-88.55)    |
|     | MACE         | 7.88<br>(6.77-9.17)       | 8.24<br>(6.92-9.82)       | 9.29<br>(7.86-10.99)      |
|     | Mortality    | 10.02<br>(8.44-11.89)     | 11.32<br>(9.35-13.70)     | 11.42<br>(9.43-13.83)     |
| G3b | 40% decline  | 7.51<br>(3.09-18.25)      | 25.57<br>(16.45-39.75)    | 82.00<br>(65.86-102.10)   |
|     | KF           | 57.98<br>(33.68-99.81)    | 133.44<br>(93.77-189.89)  | 308.02<br>(241.57-392.74) |
|     | MAKE         | 25.77<br>(15.53-42.75)    | 59.51<br>(43.62-81.17)    | 138.88<br>(115.11-167.56) |
|     | MACE         | 11.05<br>(8.37-14.58)     | 11.38<br>(8.93-14.49)     | 13.93<br>(11.89-16.32)    |
|     | Mortality    | 17.07<br>(13.02-22.37)    | 13.86<br>(10.69-17.96)    | 16.73<br>(14.11-19.83)    |
| G4  | 40% decline  | 12.01<br>(2.98-48.35)     | 35.63<br>(4.87-67.27)     | 57.30<br>(43.94-74.72)    |
|     | KF           | 202.76<br>(105.74-388.80) | 366.61<br>(237.76-565.29) | 727.90<br>(569.34-930.64) |
|     | MAKE         | 82.71<br>(43.90-155.79)   | 150.74<br>(100.47-266.18) | 327.89<br>(270.41-397.58) |
|     | MACE         | 14.69<br>(8.51-25.35)     | 18.72<br>(12.71-27.57)    | 20.69<br>(17.27-24.79)    |
|     | Mortality    | 14.20<br>(7.37-27.36)     | 27.30<br>(18.99-39.23)    | 27.78<br>(23.26-33.18)    |

G1: eGFR ≥90, G2: eGFR 60–89, G3a: eGFR 45–59, G3b: eGFR 30–44, G4: eGFR 15–29, G5: eGFR < 15 ml/min/1.73 m<sup>2</sup>  
A1: urine albumin/creatinine ratio (UACR) <30mg/g, A2: UACR 30–300 mg/g, A3: UACR >300 mg/g, KF: Kidney failure, MAKE: Major adverse kidney event, MACE: Major adverse cardiovascular event

**Table S4b | Unadjusted hazard ratios for major outcomes with G1A1 alone as reference**

|            |                    | <b>A1</b>                 | <b>A2</b>                 | <b>A3</b>                   |
|------------|--------------------|---------------------------|---------------------------|-----------------------------|
| <b>G1</b>  | <b>40% decline</b> | 1                         | 6.36<br>(4.83-8.38)       | 21.47<br>(15.84-29.10)      |
|            | <b>KF</b>          | 1                         | 5.78<br>(3.76-8.90)       | 27.07<br>(17.64-41.43)      |
|            | <b>MAKE</b>        | 1                         | 5.24<br>(4.02-6.83)       | 19.35<br>(14.53-25.78)      |
|            | <b>MACE</b>        | 1                         | 2.65<br>(2.35-2.98)       | 3.24<br>(2.63-4.00)         |
|            | <b>Mortality</b>   | 1                         | 2.76<br>(2.36-3.23)       | 3.71<br>(2.85-4.83)         |
| <b>G2</b>  | <b>40% decline</b> | 2.62<br>(1.93-3.57)       | 15.04<br>(11.43-19.79)    | 34.85<br>(26.72-45.47)      |
|            | <b>KF</b>          | 4.29<br>(2.89-6.38)       | 17.67<br>(11.90-26.23)    | 81.15<br>(57.76-114.02)     |
|            | <b>MAKE</b>        | 2.90<br>(2.23-3.78)       | 13.00<br>(10.04-16.84)    | 37.89<br>(29.69-48.37)      |
|            | <b>MACE</b>        | 3.58<br>(3.28-3.90)       | 6.88<br>(6.13-7.72)       | 10.00<br>(8.69-11.51)       |
|            | <b>Mortality</b>   | 3.72<br>(3.31-4.18)       | 7.40<br>(6.38-8.58)       | 11.07<br>(9.31-13.17)       |
| <b>G3a</b> | <b>40% decline</b> | 12.76<br>(8.39-19.42)     | 17.70<br>(11.63-26.93)    | 63.41<br>(48.56-82.81)      |
|            | <b>KF</b>          | 39.06<br>(25.07-60.84)    | 52.14<br>(33.15-81.99)    | 226.77<br>(163.90-313.75)   |
|            | <b>MAKE</b>        | 18.83<br>(13.37-26.51)    | 25.34<br>(17.82-36.04)    | 94.15<br>(74.50-118.99)     |
|            | <b>MACE</b>        | 11.23<br>(9.61-13.13)     | 11-76<br>(9.84-14.07)     | 13.23<br>(11.14-15.71)      |
|            | <b>Mortality</b>   | 14.50<br>(12.13-17.34)    | 16.39<br>(13.46-19.96)    | 16.51<br>(13.54-20.12)      |
| <b>G3b</b> | <b>40% decline</b> | 9.23<br>(3.78-22.52)      | 31.41<br>(20.02-49.30)    | 100.73<br>(79.40-127.79)    |
|            | <b>KF</b>          | 90.01<br>(50.74-159.70)   | 207.10<br>(139.16-308.22) | 477.82<br>(352.43-647.82)   |
|            | <b>MAKE</b>        | 33.90<br>(20.25-56.77)    | 78.27<br>(56.54-108.36)   | 182.56<br>(147.80-225.48)   |
|            | <b>MACE</b>        | 15.70<br>(11.87-20.78)    | 16.13<br>(12.63-20.59)    | 19.71<br>(16.76-23.19)      |
|            | <b>Mortality</b>   | 24.66<br>(18.73-32.46)    | 20.01<br>(15.37-26.07)    | 24.12<br>(20.21-28.79)      |
| <b>G4</b>  | <b>40% decline</b> | 14.75<br>(3.65-59.57)     | 43.76<br>(23.02-83.19)    | 70.38<br>(53.13-93.23)      |
|            | <b>KF</b>          | 314.45<br>(159.89-618.42) | 568.65<br>(355.32-910.05) | 1128.75<br>(830.76-1533.63) |
|            | <b>MAKE</b>        | 108.70<br>(57.28-206.26)  | 198.13<br>(130.55-300.68) | 430.79<br>(347.24-534.45)   |
|            | <b>MACE</b>        | 20.74<br>(12.01-35.84)    | 26.44<br>(17.92-39.00)    | 29.23<br>(24.31-35.14)      |
|            | <b>Mortality</b>   | 20.44<br>(10.59-39.46)    | 39.33<br>(27.28-56.72)    | 39.98<br>(33.26-48.06)      |

G1: eGFR  $\geq 90$ , G2: eGFR 60–89, G3a: eGFR 45–59, G3b: eGFR 30–44, G4: eGFR 15–29, G5: eGFR  $< 15$  ml/min/1.73 m<sup>2</sup> A1: urine albumin/creatinine ratio (UACR)  $< 30$  mg/g, A2: UACR 30–300 mg/g, A3: UACR  $> 300$  mg/g, KF: Kidney failure, MAKE: Major adverse kidney event, MACE: Major adverse cardiovascular event

## **Supplementary figure titles and legends:**

### **Figure S1**

Flow diagram of participant selection

**Legend:** NDR: National Diabetes Register,

G1a: eGFR  $\geq 105$ , G1b: eGFR 90–104, G2: eGFR 60–89, G3a: eGFR 45–59, G3b: eGFR 30–44, G4: eGFR 15–29 ml/min/1.73m<sup>2</sup>. KF; Kidney failure = G5 (eGFR <15 ml/min/1.73m<sup>2</sup>)

### **Figure S2**

Cumulative incidence of renal outcomes using Kaplan-Meier survival plots

- a. 40% eGFR decline
- b. Acute kidney injury
- c. Kidney Failure
- d. MAKE
- e. Renal death

**Legend:** G1a: eGFR  $\geq 105$ , G1b: eGFR 90–104, G2: eGFR 60–89, G3a: eGFR 45–59, G3b: eGFR 30–44, G4: eGFR 15–29 ml/min/1.73m<sup>2</sup>

### **Figure S3**

Cumulative incidence of CV outcomes using Kaplan-Meier survival plots

- a. Coronary heart disease
- b. Stroke
- c. Cardiovascular death
- d. MACE
- e. Heart Failure

**Legend:** G1a: eGFR  $\geq 105$ , G1b: eGFR 90–104, G2: eGFR 60–89, G3a: eGFR 45–59, G3b: eGFR 30–44, G4: eGFR 15–29 ml/min/1.73m<sup>2</sup>

### **Figure S4**

Cumulative incidence of all-cause mortality using Kaplan-Meier survival plots

**Legend:** G1a: eGFR  $\geq 105$ , G1b: eGFR 90–104, G2: eGFR 60–89, G3a: eGFR 45–59, G3b: eGFR 30–44, G4: eGFR 15–29 ml/min/1.73m<sup>2</sup>



## References:

1. Nationella Diabetesregistret, årsrapport 2021.  
[https://www.ndr.nu/pdfs/Arsrapport\\_NDR\\_2021.pdf](https://www.ndr.nu/pdfs/Arsrapport_NDR_2021.pdf).
2. Rawshani A, Sattar N, Franzen S, Rawshani A, Hattersley AT, Svensson AM, et al. Excess mortality and cardiovascular disease in young adults with type 1 diabetes in relation to age at onset: a nationwide, register-based cohort study. *Lancet*. 2018;392(10146):477-86.
3. Ludvigsson JF, Andersson E, Ekbom A, Feychting M, Kim JL, Reuterwall C, et al. External review and validation of the Swedish national inpatient register. *BMC Public Health*. 2011;11:450.
4. Brooke HL, Talbäck M, Hörnblad J, Johansson LA, Ludvigsson JF, Druid H, et al. The Swedish cause of death register. *Eur J Epidemiol*. 2017;32(9):765-73.
5. Eliasson B, Lyngfelt L, Strömblad SO, Franzén S, Eeg-Olofsson K. The significance of chronic kidney disease, heart failure and cardiovascular disease for mortality in type 1 diabetes: nationwide observational study. *Sci Rep*. 2022;12(1):17950.
6. Group KDIGOKCW. KDIGO 2012 Clinical Practice Guideline for the Evaluation and Management of Chronic Kidney Disease. *Kidney inter, Suppl* 2013; 3: 1–150. 2012.
