# Supplementary material
Source: publisher figshare collection journal article supplement (https://diabetesjournals.figshare.com/articles/dataset/_/27283899)

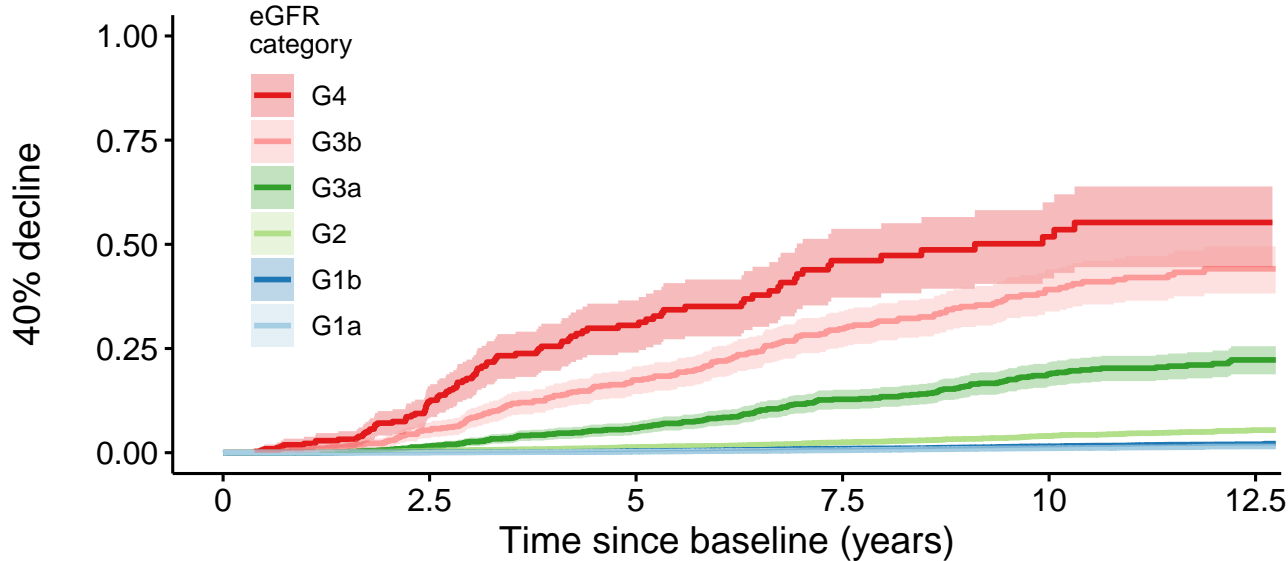

Number at risk by time

| eGFR category | 0     | 2.5   | 5     | 7.5   | 10    | 12.5 |
|---------------|-------|-------|-------|-------|-------|------|
| G4            | 337   | 220   | 94    | 49    | 28    | 6    |
| G3b           | 617   | 504   | 362   | 232   | 136   | 19   |
| G3a           | 1043  | 916   | 758   | 587   | 423   | 89   |
| G2            | 6051  | 5763  | 5361  | 4882  | 4070  | 991  |
| G1b           | 8169  | 7828  | 7316  | 6679  | 5580  | 1224 |
| G1a           | 22850 | 20634 | 17616 | 14472 | 10534 | 2007 |

Time since baseline (years)

Supplement: Supplementary file 1 [file 1]

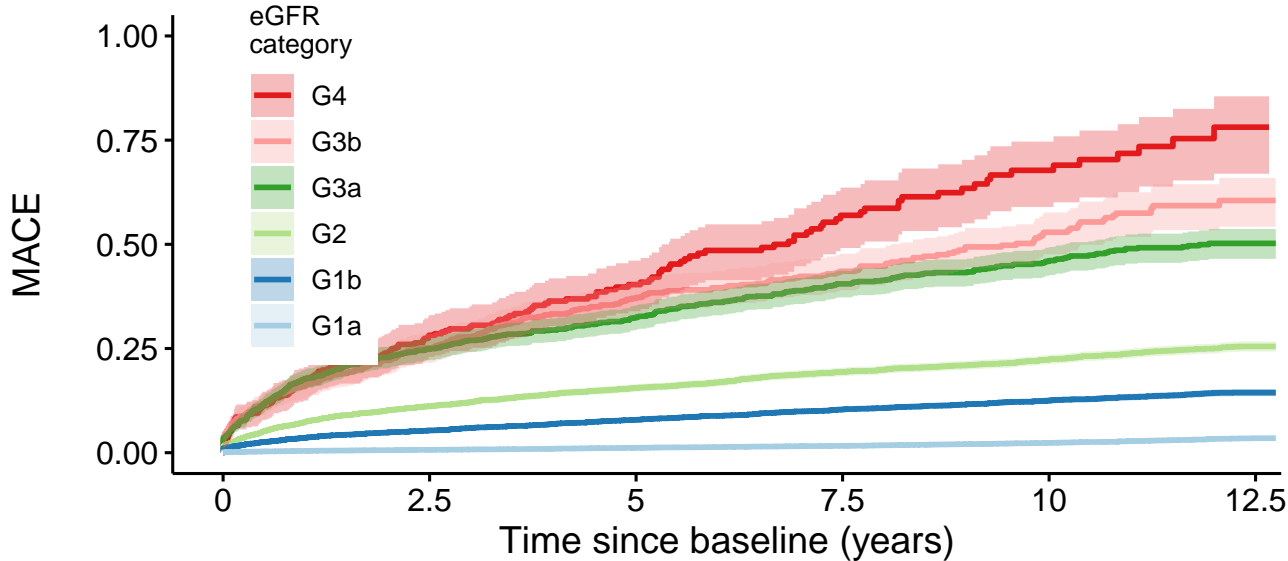

Number at risk by time

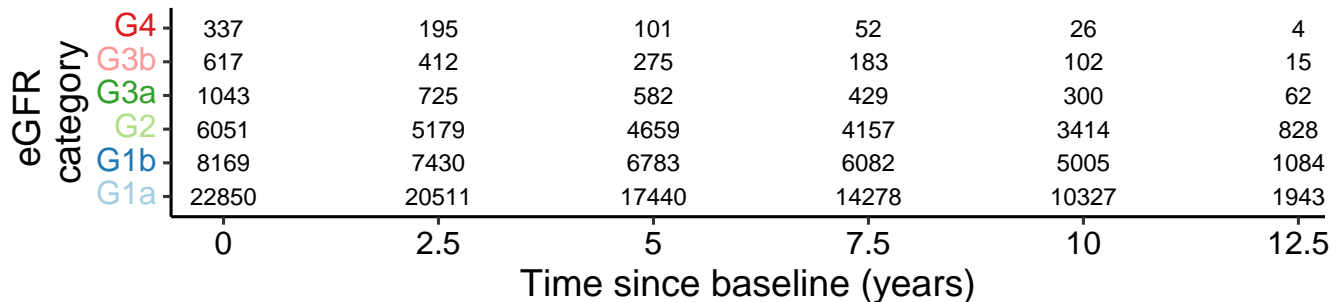

Supplement: Supplementary file 2 [file 1]

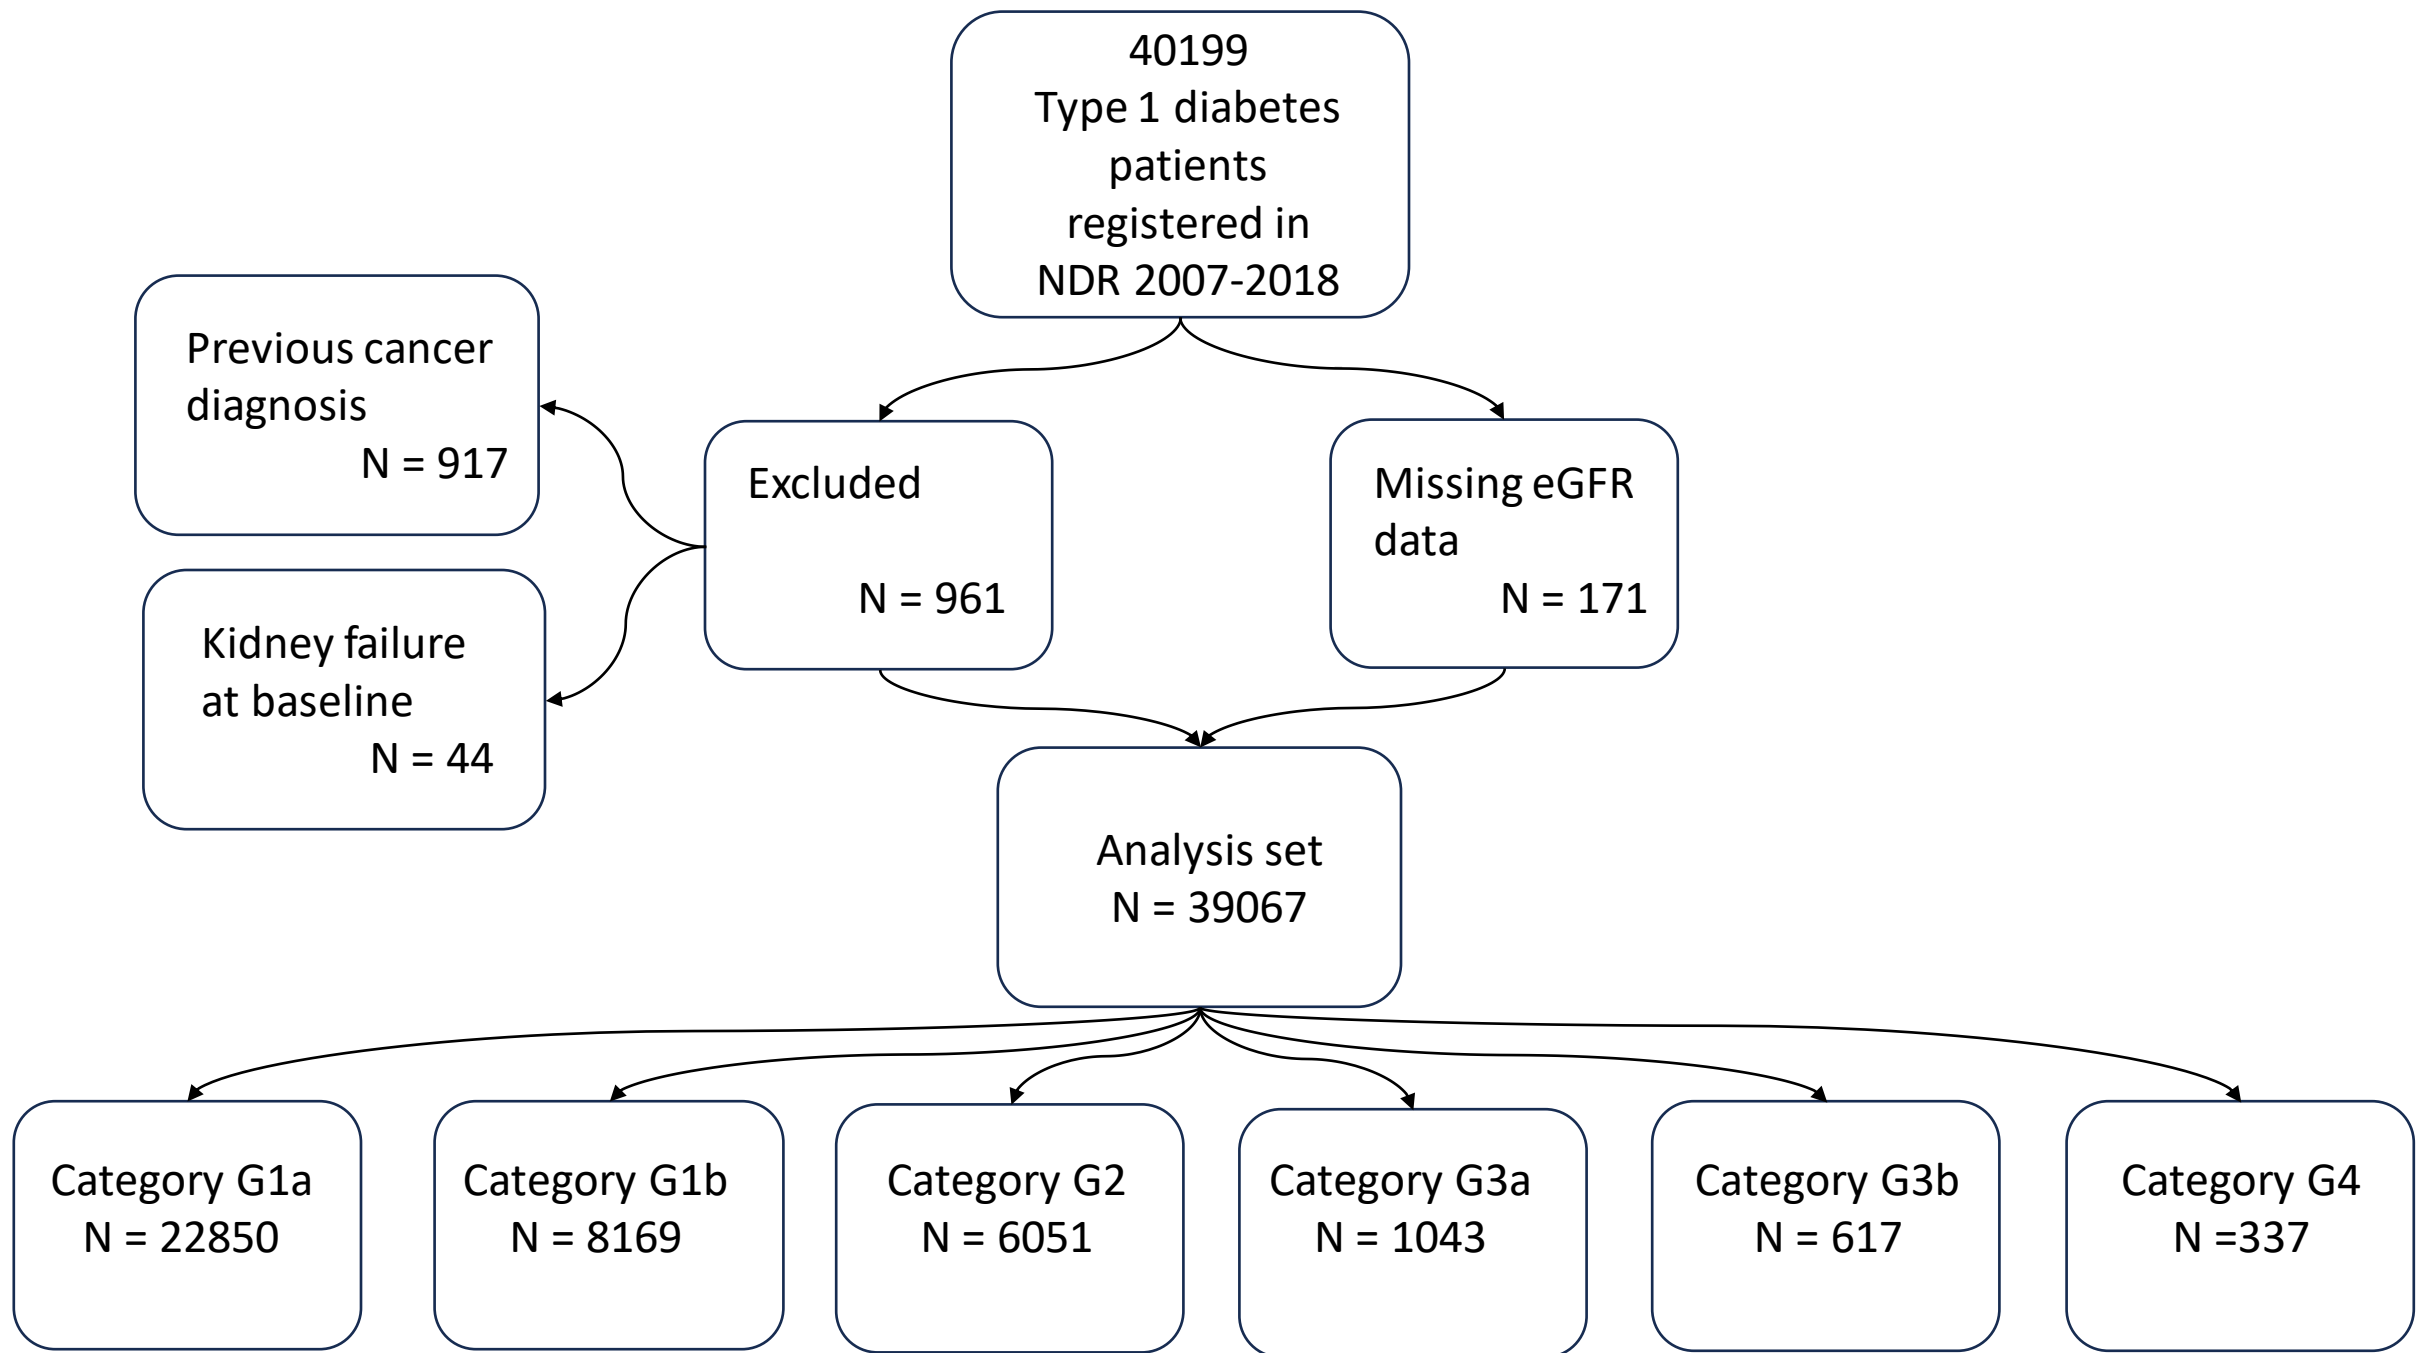

Supplement: Supplementary file 3 [file 1]

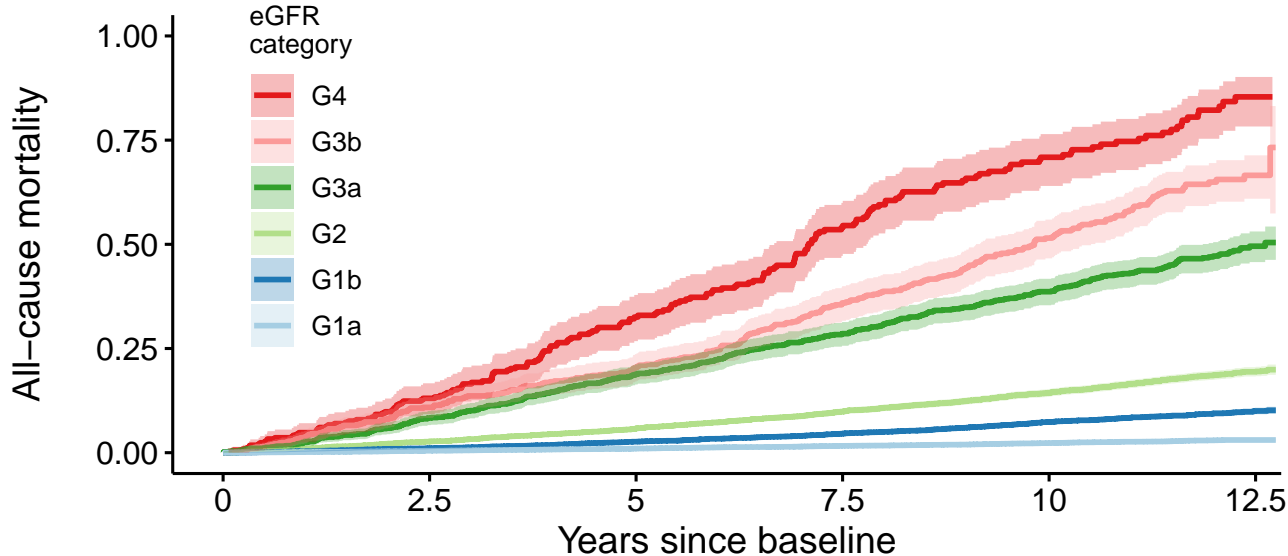

Number at risk by time

| eGFR category | 0     | 2.5   | 5     | 7.5   | 10    | 12.5 |
|---------------|-------|-------|-------|-------|-------|------|
| G4            | 337   | 261   | 161   | 94    | 49    | 6    |
| G3b           | 617   | 525   | 417   | 279   | 169   | 21   |
| G3a           | 1043  | 934   | 783   | 628   | 455   | 95   |
| G2            | 6051  | 5789  | 5412  | 4960  | 4160  | 1009 |
| G1b           | 8169  | 7834  | 7332  | 6722  | 5628  | 1238 |
| G1a           | 22850 | 20645 | 17649 | 14538 | 10618 | 2032 |

**Years since baseline**

Supplement: Supplementary file 5 [file 1]

Heart Failure

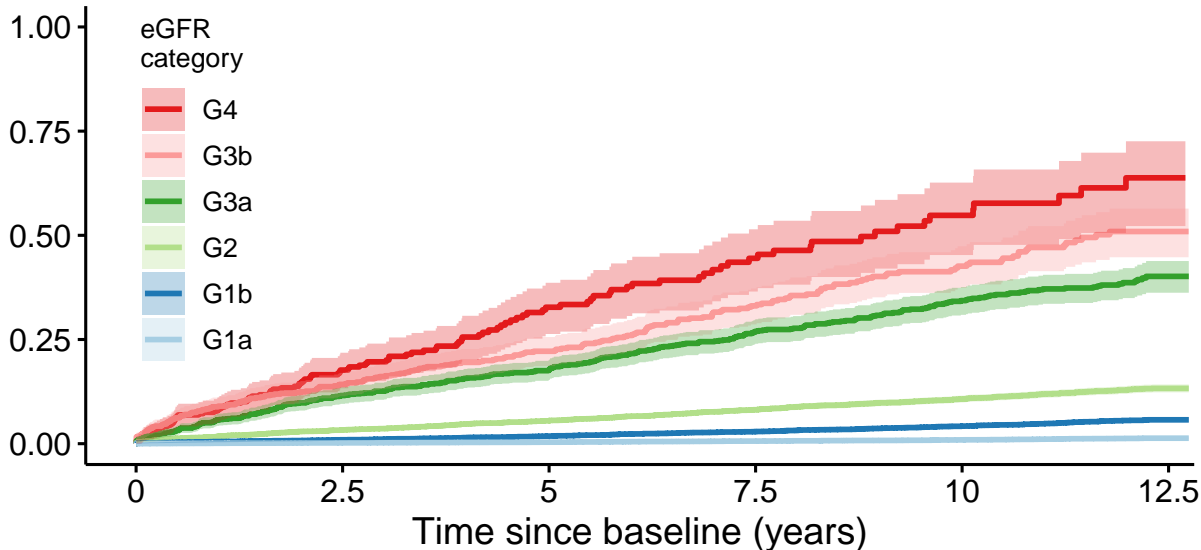

Number at risk by time

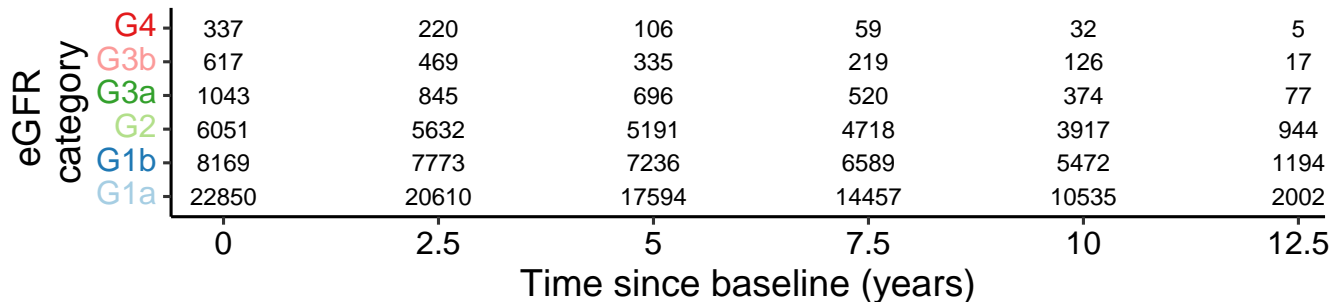

Supplement: Supplementary file 6 [file 1]

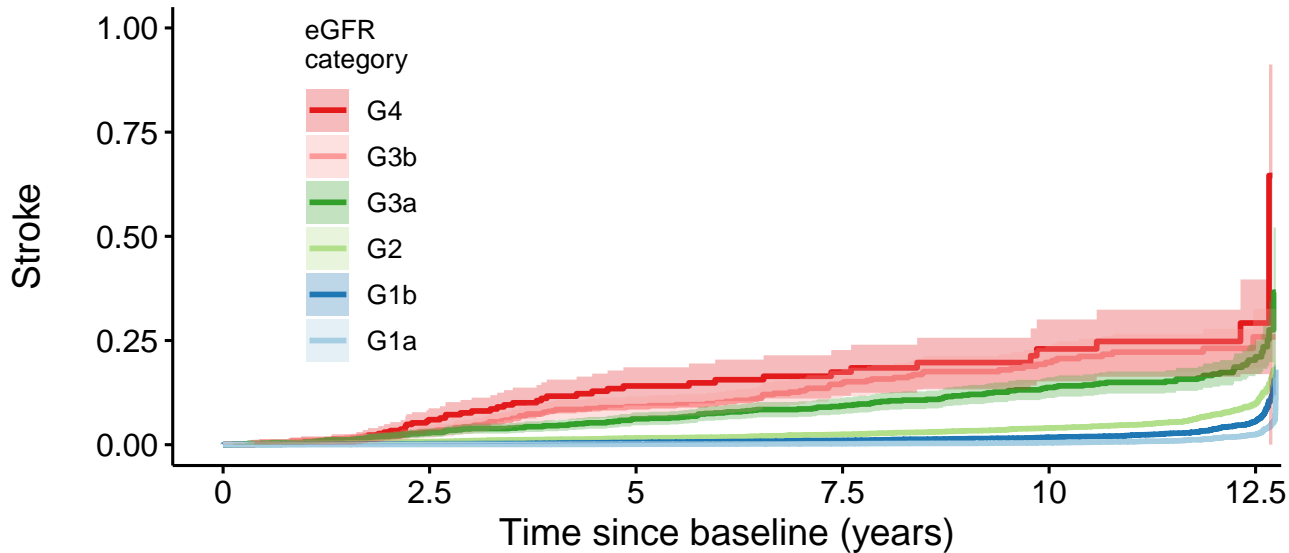

Number at risk by time

| eGFR category | 0     | 2.5   | 5     | 7.5   | 10    | 12.5 |
|---------------|-------|-------|-------|-------|-------|------|
| G4            | 337   | 245   | 131   | 82    | 46    | 9    |
| G3b           | 617   | 518   | 385   | 266   | 174   | 25   |
| G3a           | 1043  | 919   | 768   | 610   | 449   | 99   |
| G2            | 6051  | 5767  | 5377  | 4926  | 4135  | 1007 |
| G1b           | 8169  | 7822  | 7313  | 6698  | 5608  | 1235 |
| G1a           | 22850 | 20642 | 17644 | 14534 | 10616 | 2029 |

Time since baseline (years)

Supplement: Supplementary file 7 [file 1]

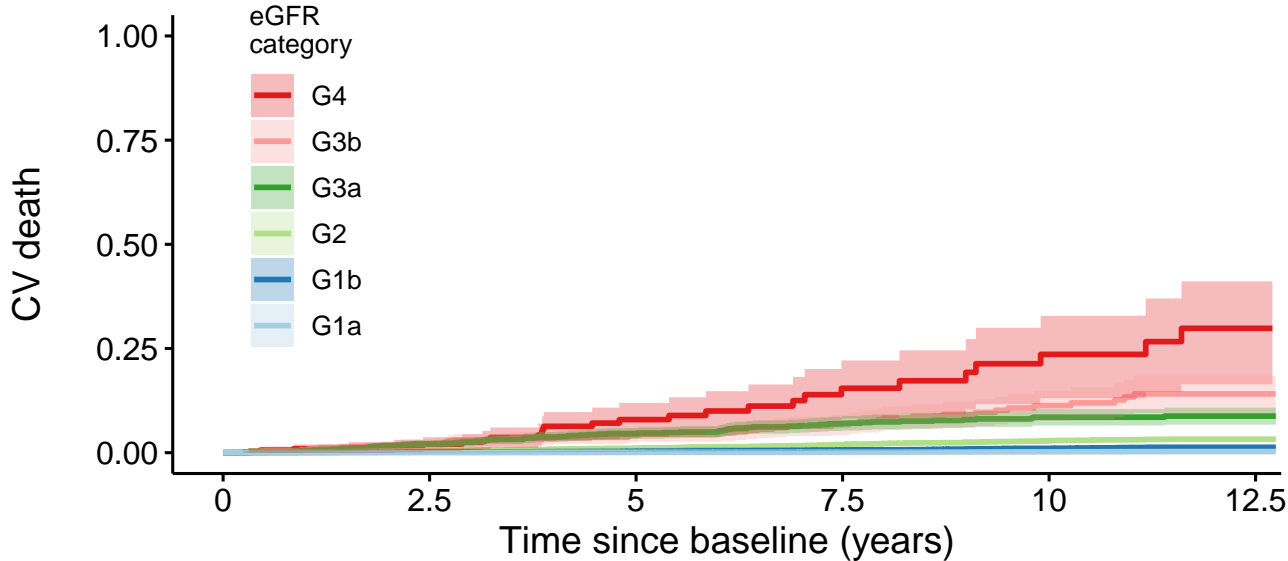

Number at risk by time

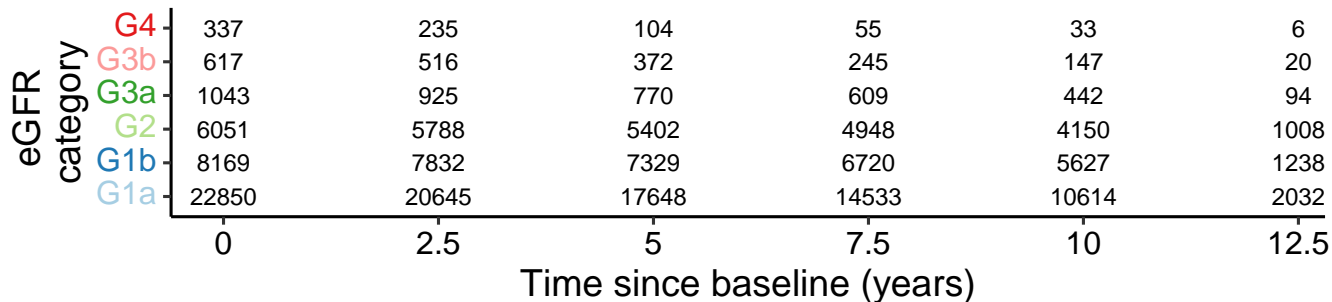

Supplement: Supplementary file 8 [file 1]

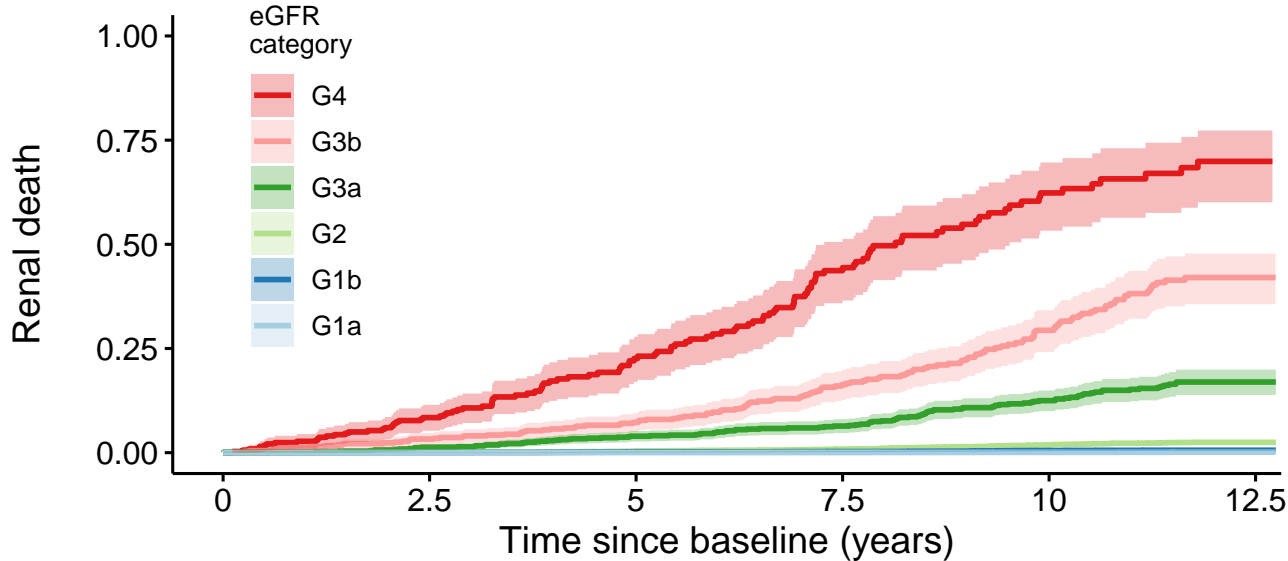

Number at risk by time

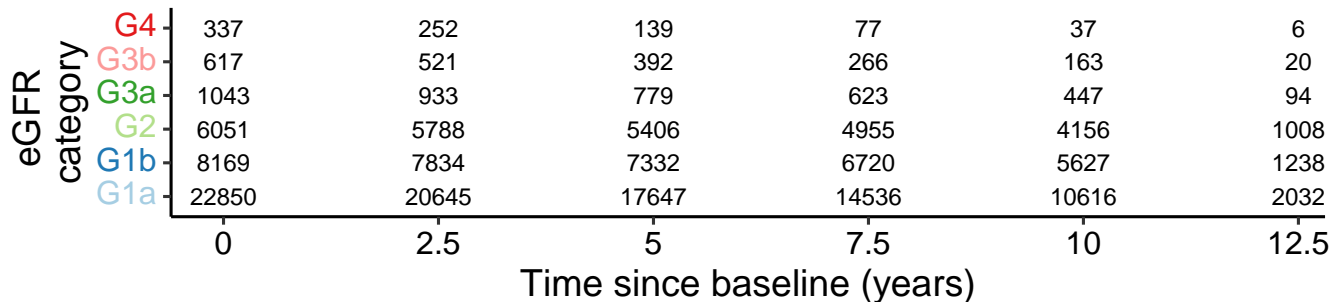

Supplement: Supplementary file 9 [file 1]

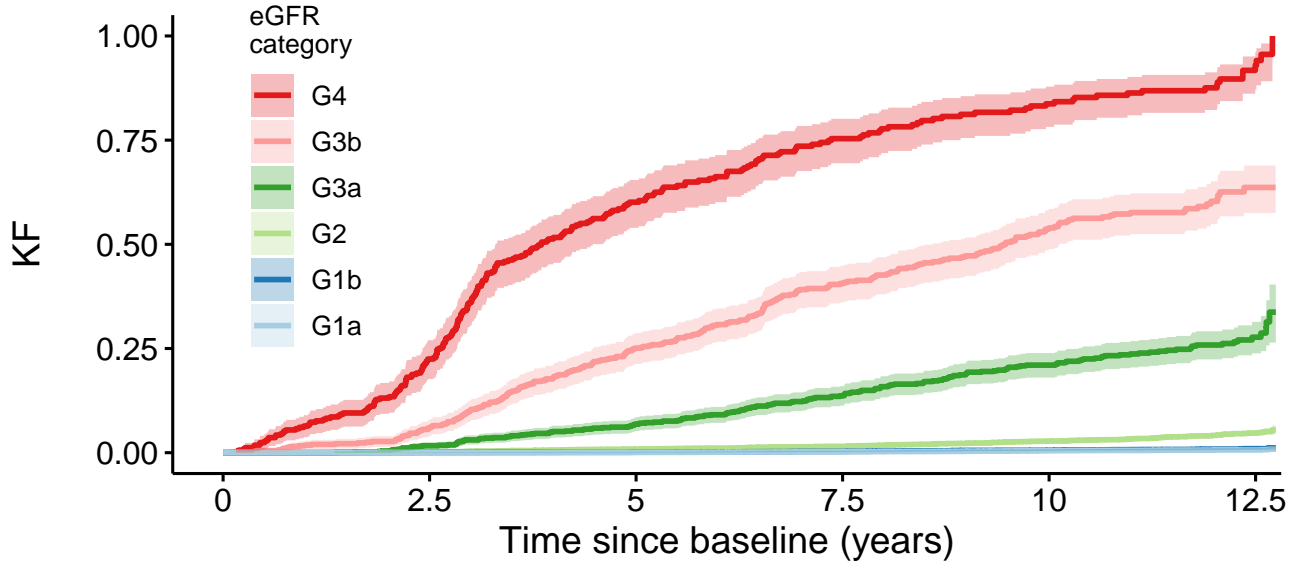

Number at risk by time

| eGFR category | 0     | 2.5   | 5     | 7.5   | 10    | 12.5 |
|---------------|-------|-------|-------|-------|-------|------|
| G4            | 337   | 231   | 100   | 54    | 32    | 6    |
| G3b           | 617   | 515   | 368   | 240   | 144   | 20   |
| G3a           | 1043  | 924   | 770   | 607   | 441   | 94   |
| G2            | 6051  | 5786  | 5399  | 4944  | 4149  | 1008 |
| G1b           | 8169  | 7832  | 7329  | 6720  | 5627  | 1238 |
| G1a           | 22850 | 20645 | 17647 | 14532 | 10613 | 2032 |

Supplement: Supplementary file 10 [file 1]

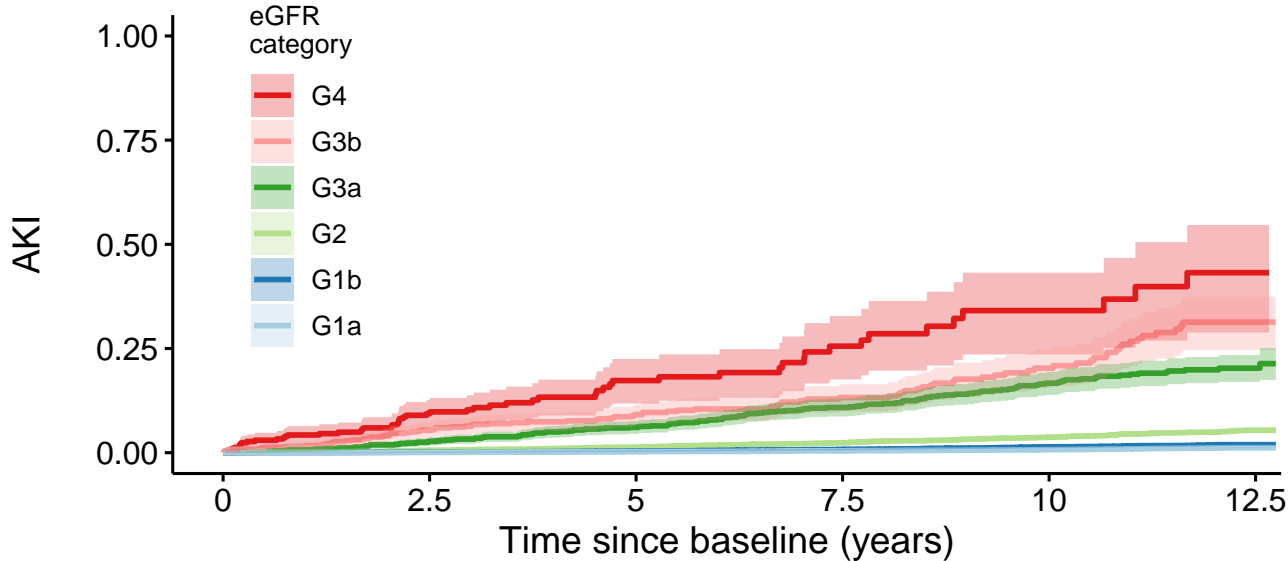

Number at risk by time

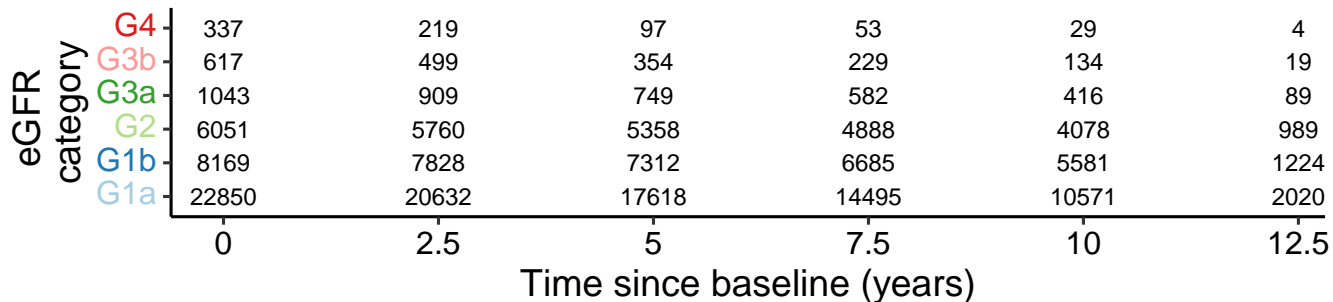

Supplement: Supplementary file 11 [file 1]

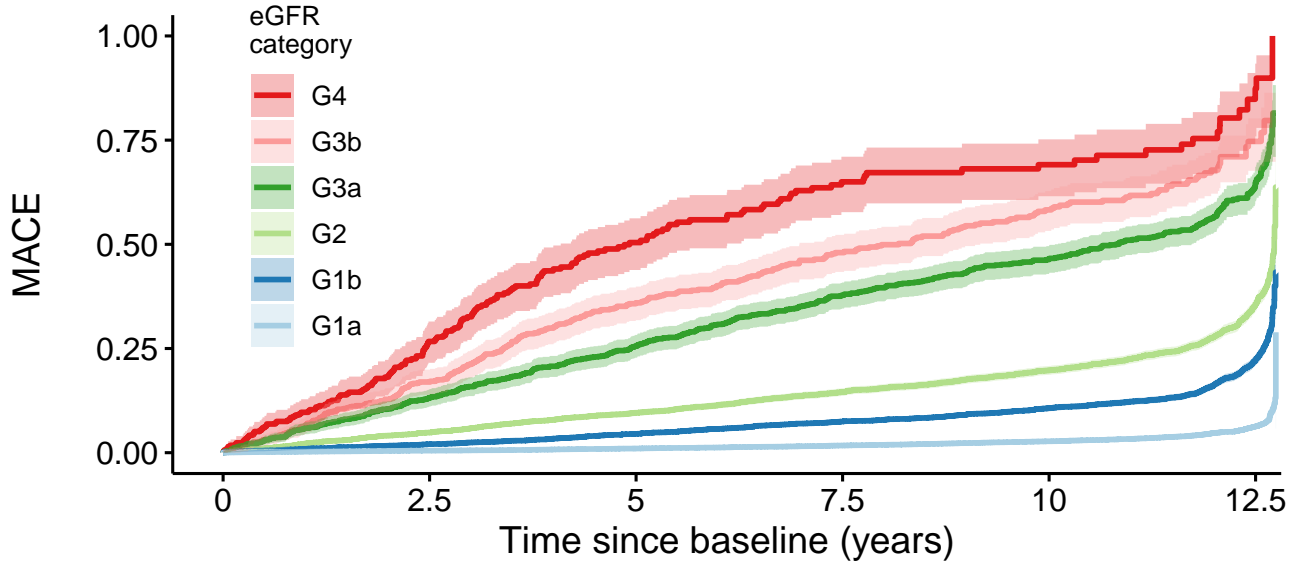

Number at risk by time

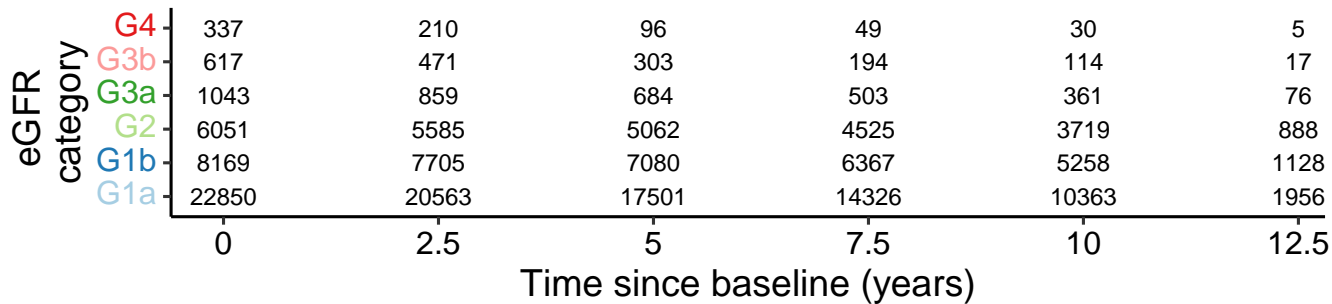

Supplement: Supplementary file 12 [file 1]
